# Supplementary material
Source: publisher figshare collection journal article supplement (https://gsajournals.figshare.com/articles/dataset/_/13549292)
Supplement: Supplementary file 1 [file 1]

## Sheet: Sheet1
hsp42Δ / WT								rpl21Δ / WT			rpl4aΔ / WT					rps30bΔ / WT
0.012	HSP42							0.31	FUI1		0.15	Ty2-GR2				0.13	YJR154W Uncharacterized
0.17	IPT1 InositolPhosphoTransferase							0.39	MKT1		0.21	FUI1				0.14	BIO4 Dethiobiotin synthetase
0.19	FUI1 uridine permease										0.21	YJY5 ER membrane protein				0.16	Biotin synth
0.21	YL21B Ty1 polyprotein										0.21	ECM38 GSH hydrolase				0.16	SSA4
0.21	CCW12 Cell wall mannoprotein										0.22	SSA4 inducible cytoplasmic Hsp70				0.24	Ty2-DR3 Gag-Pol
0.24	HSP150 Cell wall HSP										0.23	MUP1 methionine permease				0.24	BIO2 Biotin synthase, mitochondrial
0.24	YNL058C Vacuolar membrane protein										0.24	IPT1				0.32	HSP26 Heat shock protein
0.25	UBC6 E2 Ubi-conjugating-ERAD										0.25	SPE1
0.25	DOT6 Transcription factor										0.26	RPL22B
0.26	MKT1 maintenance of K2										0.27	GIT1 Glycerophosphoinositol transporter
0.27	YD21B Ty2 Gag-Pol										0.28	MKT1
0.28	GNP1 glutamine permease										0.28	HLR1
0.29	HIP1 Histidine permease										0.29	YBC8 UPF0642 protein YBL028C
0.3	STE6 Alpha-factor-transporting ATPase										0.29	SEO1 Probable transporter
0.3	FCY2 Purine-cytosine permease										0.29	SRL3
0.31	YHT1 PH domain-containing protein										0.29	CPR4 Peptidyl-prolyl cis-trans isomerase
0.31	STE2 Alpha pheromone receptor										0.3	NDD1 Nuclear division defective
0.32	BUD20 Bud site selection protein										0.32	BUD20 Bud site selection
0.33	DIP5 Dicarboxylic amino acid permease										0.32	DOT6
0.33	CLB2 type 2 cyclin										0.33	FCY2
											3.1	CTT1
											3.2	HSP31
								3.2	FUN19		3.4	CYC7 iso-2-Cytochrome c
2.9	HSP31 GSH-indep glyoxalase							3.3	RPL22B		3.8	ARG8
3.1	FUN19 SWIRM domain-containing protein							3.4	TMT1		4.1	ARG3
3.5	CATT Catalase T							3.7	ARG3		4.4	MIH1 M-phase inducer phosphatase
4.3	ARG8 Acetylornithine aminotransf, mitoch							3.8	ARG8		4.8	TMT1 Trans-aconitate 3-methyltransferase
4.4	ARG3 Ornithine carbamoyltransferase				trans-aconitate 3-methyl transf			3.9	HMX1 Heme-binding		5.4	YIL001W Ankyrin repeat-containing protein
28	TMA10 Translation machinery-associated							39.6	TMA10		22.1	TMA10				2.4	TMA10
